# Supplementary material
Source: Springer Nature journal article supplement (https://www.springermedizin.de/resource/supplementary/12943_2010_771_MOESM11_ESM.pdf/9554780)

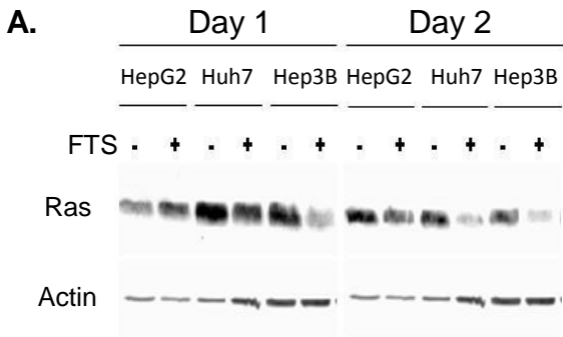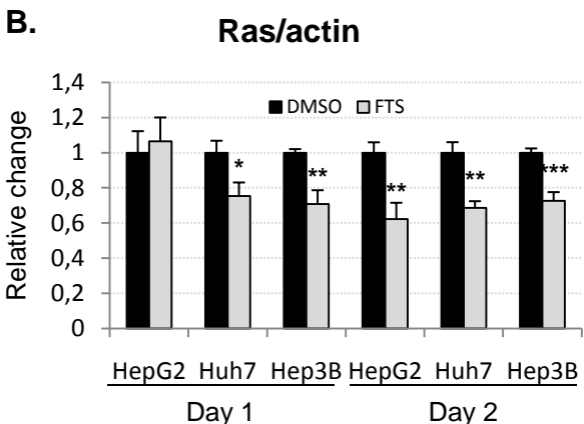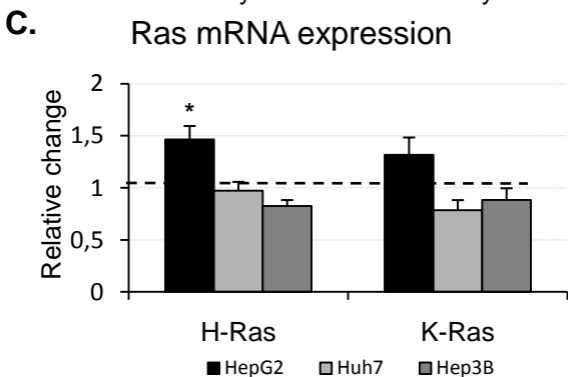

**D. Ras activation in HepG2 cells**

|     |   |   |   |   |   |   |   |   |   |
|-----|---|---|---|---|---|---|---|---|---|
| EGF | - | - | - | + | + | - | - | + | + |
| IGF | - | + | + | - | - | + | + | - | - |
| FTS | - | - | - | - | - | + | + | + | + |

**Ras-GTP**

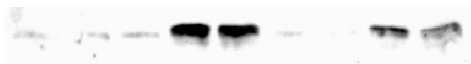

Supplement: MOESM11 [file 9554780]
